# Supplementary material
Source: Springer Nature journal article supplement (https://www.springermedizin.de/resource/supplementary/12903_2011_201_MOESM7_ESM.pdf/9516364)

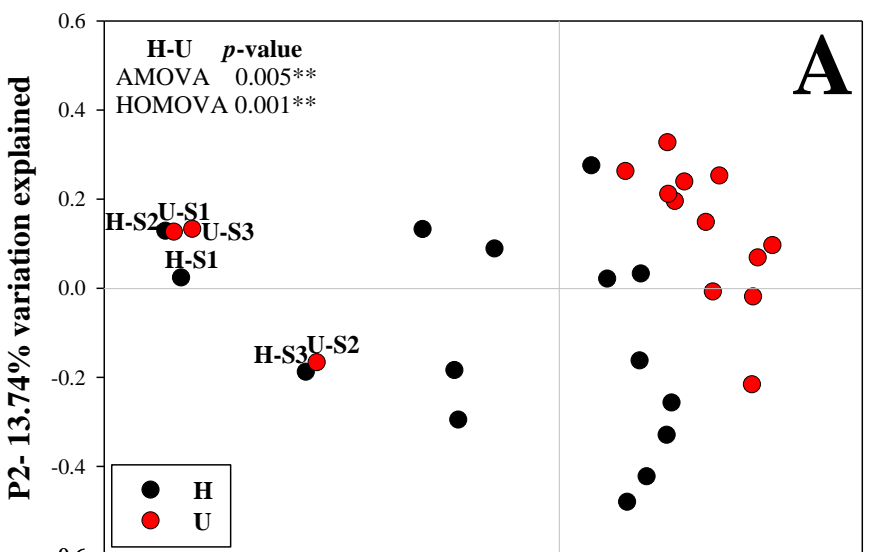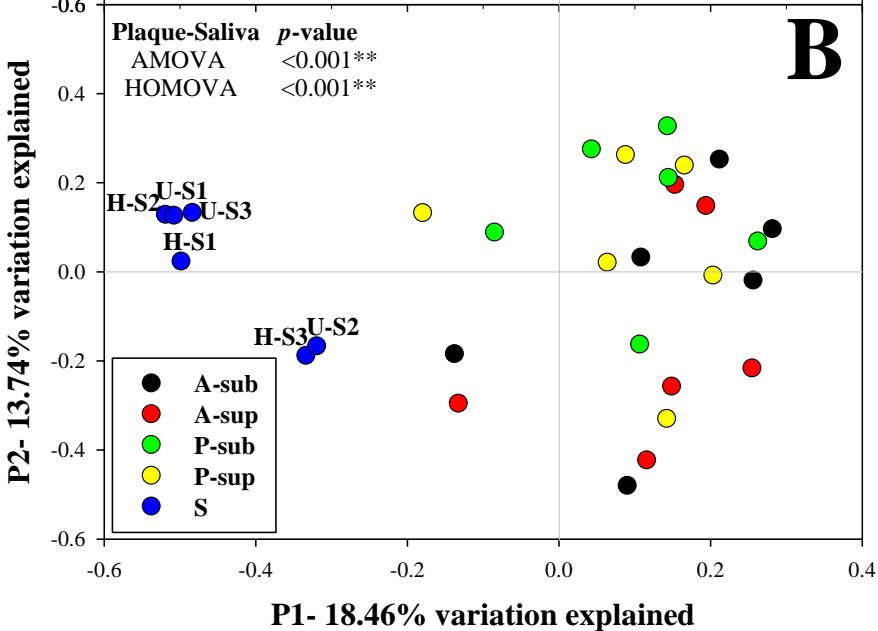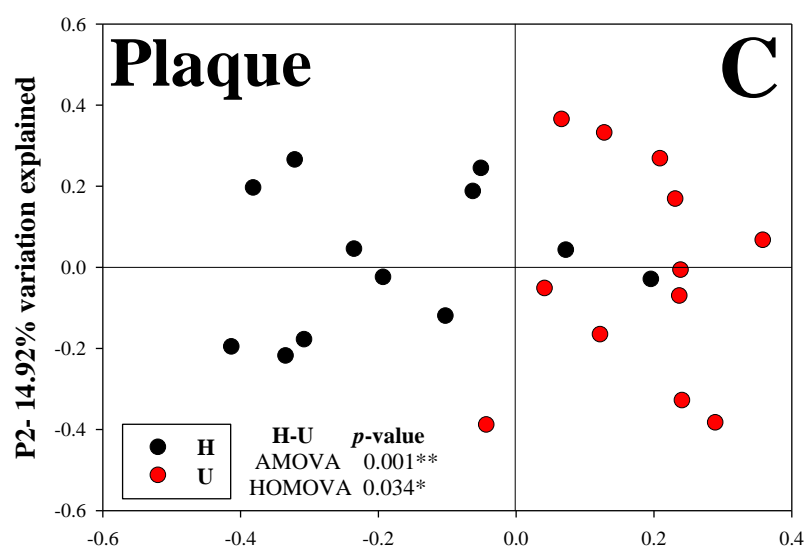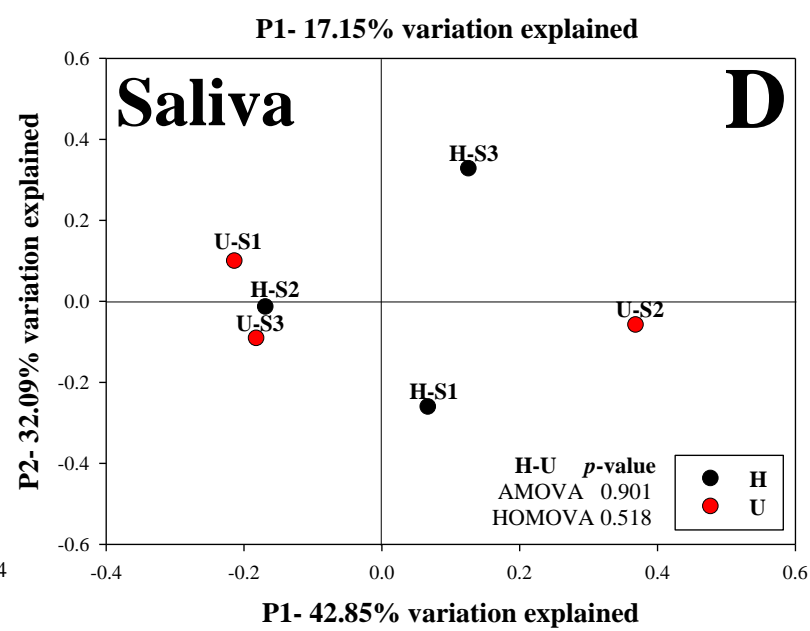

Supplement: MOESM7 [file 9516364]
